# Supplementary material for: Subtype and grade-dependent spatial heterogeneity of T-cell infiltration in pediatric glioma
Source: PubMed Central journal article supplement — J Immunother Cancer. 2020 Aug 11;8(2):e001066. doi: 10.1136/jitc-2020-001066 (PMC7422651; doi:10.1136/jitc-2020-001066), 2020-08-11
Supplement: jitc-2020-001066supp001.pdf [file jitc-2020-001066supp001.pdf]

## Supplementary data

### Table of contents

|                |                                                                       |
|----------------|-----------------------------------------------------------------------|
| <b>Figures</b> |                                                                       |
| Figure S1      | Correlation between T cell infiltration and SOX2 expression           |
| Figure S2      | Detection of BRAF <sup>V600E</sup> mutation specific T cells          |
| <b>Tables</b>  |                                                                       |
| Table S1A      | Patient Characteristics: samples used for multiplex IHC               |
| Table S1B      | Patient Characteristics: samples used for CyTOF and functional assays |
| Table S1C      | Patient Characteristics: recurrent pilocytic astrocytomas             |
| Table S2       | Antibodies used for single cell mass cytometry                        |
| Table S3       | Antibodies used for multiplex IHC staining                            |

## Supplementary Figure 1

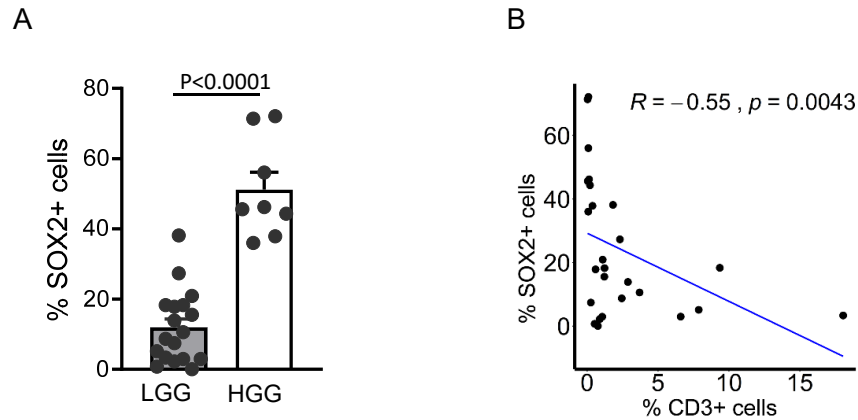

Supplementary Figure 1. Correlation between T cell infiltration and SOX2 expression.

Multiplex IHC slides were analyzed for presence of SOX2 positive tumor cells and CD3+T cells

- Bar graph shows SOX2 positive T cells in tissue from low grade glioma (n=18, PAX, GG and PA) and high grade glioma (HGG n=8, GBM +AA).
- Scatter plot showing negative correlation between abundance of SOX2 expressing tumor cells and CD3+ T cells.

## Supplementary Figure 2

A

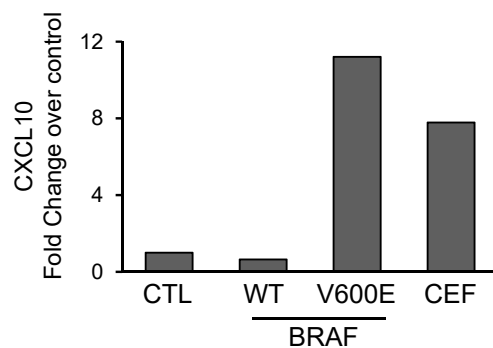

B

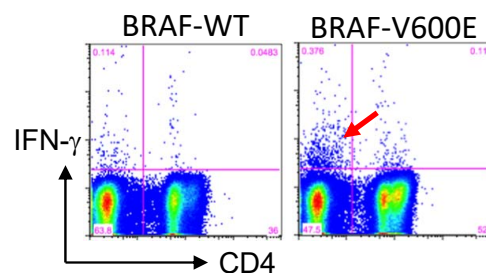

Supplementary Figure 2. Detection of BRAF<sup>V600E</sup> mutation specific T cells.

- Peripheral blood mononuclear cells were cultured alone (CTL), with wild type (WT) or V600E mutant BRAF peptides. Pooled viral peptides from Cytomegalovirus, Epstein-Barr Virus, and Influenza Virus (CEF) were used as positive control. Figure shows BRAF<sup>V600E</sup> T cells reactivity using a CXCL10 luminex assay.
- Expansion of IFN $\gamma$  secreting BRAF<sup>V600E</sup> specific T cells following stimulation with peptide loaded autologous dendritic cells.

**Supplementary Table 1A.** Patient characteristics: samples used for multiplex IHC

| Tumor Type (n)                   | Low Grade Glioma |             |            | High Grade Glioma                                                                                                                                                   |
|----------------------------------|------------------|-------------|------------|---------------------------------------------------------------------------------------------------------------------------------------------------------------------|
|                                  | PXA (5)          | GG (7)      | PA (6)     | HGG (7)                                                                                                                                                             |
| <b>Age mean in years (range)</b> | 12.4 (7-17)      | 10.1 (3-18) | 7.5 (2-16) | 11.9 (0.5-17)                                                                                                                                                       |
| <b>Gender – Male</b>             | 4 (80%)          | 3 (43%)     | 3 (50%)    | 5 (71%)                                                                                                                                                             |
| <b>Tumor Location</b>            |                  |             |            |                                                                                                                                                                     |
| Parietal                         | 3 (60%)          | 1 (14%)     | 1 (17%)    |                                                                                                                                                                     |
| Temporal                         | 2 (40%)          | 4 (57%)     |            | 5 (71%)                                                                                                                                                             |
| Thalamus                         |                  | 1 (14%)     | 1 (17%)    | 2 (29%)                                                                                                                                                             |
| Brain stem                       |                  |             | 1 (17%)    |                                                                                                                                                                     |
| Posterior fossa/Cerebellar       |                  |             | 3 (50%)    |                                                                                                                                                                     |
| Not specified                    |                  | 1 (14%)     |            |                                                                                                                                                                     |
| <b>BRAF status</b>               |                  |             |            |                                                                                                                                                                     |
| BRAF V600E                       | 4 (80%)          | 4 (57%)     | 0%         | 1(14%)                                                                                                                                                              |
| BRAF-KIAA1549 fusion             | ND               | ND          | 2 (33%)    | ND                                                                                                                                                                  |
| <b>Other genetic alterations</b> |                  |             |            |                                                                                                                                                                     |
|                                  |                  |             |            | IDHwt 6 (86%)<br>H3F3AG34R 3 (43%)<br>H3K27M 1 (14%)<br>TP53 4 (57%)<br>ATRX 3 (43%)<br>Amplification: MYCN, MDM4,<br>PIK3C2B, EGFR (14% each)<br>PTEN loss 1 (14%) |

ND – Not determined

**Supplementary Table 1B.** Patient characteristics: samples used for CyTOF and functional assays

|                                  | Low Grade Glioma |            |            | High Grade Glioma |
|----------------------------------|------------------|------------|------------|-------------------|
|                                  | GG (2)           | PA (5)     | Other (2)  | Anaplastic GG (1) |
| <b>Tumor Type (n)</b>            |                  |            |            |                   |
| <b>Age mean in years (range)</b> | 7 (6-8)          | 8.9 (2-14) | 8.5 (2-15) | 18                |
| <b>Gender – Male</b>             | 0                | 2 (40%)    | 1(50%)     | 0                 |
| <b>Tumor Location</b>            |                  |            |            |                   |
| Parietal                         |                  | 2 (40%)    | 1(50%)     |                   |
| Temporal                         |                  |            |            | 1 (100%)          |
| Thalamus                         |                  |            |            |                   |
| Brain stem                       | 1 (50%)          |            |            |                   |
| Posterior fossa/Cerebellar       | 1 (50%)          | 3 (60%)    | 1(50%)     |                   |
| <b>BRAF status</b>               |                  |            |            |                   |
| BRAF V600E                       | 1 (50%)          |            |            | 1 (100%)          |

**Supplementary Table 1C.** Patient characteristics: recurrent pilocytic astrocytomas

| <b>Pt</b> | <b>Location</b> | <b>Gross Total resection at Dx</b> | <b>Time to recurrence (months)</b> |
|-----------|-----------------|------------------------------------|------------------------------------|
| <b>1</b>  | Thalamus        | No                                 | 75                                 |
| <b>2</b>  | Parietal        | Yes                                | 26                                 |
| <b>3</b>  | Brain Stem      | No                                 | 34                                 |

**Supplementary Table 2.** Antibodies used for single cell mass cytometry

| <b>Antibody</b> | <b>Clone</b> | <b>Supplier</b> |
|-----------------|--------------|-----------------|
| CD45            | HI30         | Fluidigm        |
| CD11b           | ICMF44       | Fluidigm        |
| CD19            | HIB19        | Fluidigm        |
| HLADR           | L243         | Fluidigm        |
| CD69            | FN50         | Fluidigm        |
| CD4             | RPA-T4       | Fluidigm        |
| CD8             | RPA-T8       | Fluidigm        |
| CD14            | RM052        | Fluidigm        |
| CD127           | A019D5       | Fluidigm        |
| SOX2            | 245610       | R&D Systems     |
| CD103           | Ber-ACT8     | Fluidigm        |
| CD11c           | Bu15         | Fluidigm        |
| TIGIT           | MBSA43       | Fluidigm        |
| TIM3            | F38-2E2      | Fluidigm        |
| CD27            | L128         | Fluidigm        |
| NKG2A           | Z199         | Beckman Coulter |
| CD33            | WM53         | Fluidigm        |
| CCR7            | G043H7       | Fluidigm        |
| CD163           | GHI/61       | Fluidigm        |
| CD95            | DX2          | Fluidigm        |
| CD45R0          | UCHL1        | Fluidigm        |
| NKG2D           | OW72         | Fluidigm        |
| CD25            | 2A3          | Fluidigm        |
| CD3             | UCHT1        | Fluidigm        |
| PD-L2           | 24F.10C12    | Fluidigm        |
| CD57            | HCD57        | BioLegend       |
| PD-L1           | CD274        | Fluidigm        |
| PD-1            | EH12.2H7     | Fluidigm        |
| CD56            | HCD56        | BioLegend       |
| CD16            | 3G8          | Fluidigm        |
| TCF1            | 7F11A10      | BioLegend       |
| Tbet            | 4B10         | Fluidigm        |
| FOXP3           | PCH101       | Fluidigm        |
| EOMES           | WD1928       | Ebioscience     |
| GATA3           | TWAJ         | Fluidigm        |
| Ki67            | Ki-67        | Fluidigm        |
| Granzyme        | GB11         | Fluidigm        |
| OX-40           | ACT35        | Biolegend       |
| CD11c           | Bu15         | Fluidigm        |
| CD200           | OX104        | Fluidigm        |
| CXCR5           | J25204       | Biolegend       |
| BTLA            | MIH26        | Fluidigm        |
| CD38            | HIT2         | Fluidigm        |
| 4-1BB           | 4841         | Biolegend       |

**Supplementary Table 3.** Antibodies used for multiplex IHC staining

| Order | Antibody | Clone      | Vendor         | Antibody Dilution Factor | Incubation time (minutes) | Opal |
|-------|----------|------------|----------------|--------------------------|---------------------------|------|
| 1     | SOX2     | 245610     | R&D Systems    | 1:400                    | 40                        | 570  |
| 2     | CD103    | EPR4166(2) | Abcam          | 1:500                    | 40                        | 480  |
| 3     | TCF1     | C63D9      | Cell Signaling | 1:100                    | 32                        | 520  |
| 4     | CD3      | SP7        | Abcam          | 1:100                    | 44                        | 620  |
| 5     | CD31     | PECAM-1    | Cell Signaling | 1:100                    | 40                        | 690  |
| 6     | DAPI     |            |                |                          | 16                        |      |
